# Supplementary material for: Patterning nanofibrils through the templated growth of multiple modified amyloid peptides
Source: PubMed Central journal article supplement (PMC4997568; doi:10.1038/srep31993), 2016-08-25
Supplement: srep31993-s1.pdf [file srep31993-s1.pdf]

## Supplementary Information

### **Patterning nanowires through the templated growth of multiple modified amyloid peptides**

Hiroki Sakai, Ken Watanabe, Fuki Kudoh, Rui Kamada, Yoshiro Chuman & Kazuyasu Sakaguchi<sup>1,\*</sup>

*Department of Chemistry, Faculty of Science, Hokkaido University, N10, W8, Kita-ku, Sapporo 060-0810, Japan*

\*E-mail: kazuyasu@sci.hokudai.ac.jp, TEL: +81-11-706-2698, FAX: +81-11-706-4683

#### **Contents**

**Table S1.** The peptide sequences used in this study

**Figure S1.** Fluorescence microscopy images of fluorescein-functionalized fibrils

**Figure S2.** Fluorescence microscopy images of control fluorescent fibrils

**Figure S3.**  $K_3/E_3$ -ratio dependency of the degree of symmetric tandem fibrils

**Figure S4.** AFM image of fragmented  $\alpha$ -lipoylated fibrils

**Figure S5.** AFM image of the nanoparticle-fibril complexes

**Figure S6.** AFM image of a control experiment for the initiation of fibrils from a gold nanoparticle

**Table S1.** Peptide sequences used in this study. All of the peptides were synthesized using standard Fmoc solid-phase chemistry.

| Peptide                   | Sequence                                                              |
|---------------------------|-----------------------------------------------------------------------|
| E <sub>3</sub> -TTR       | H-EEE-GG-YTIAALLSPYS-NH <sub>2</sub>                                  |
| K <sub>3</sub> -TTR       | H-KKK-GG-YTIAALLSPYS-NH <sub>2</sub>                                  |
| FAM-E <sub>3</sub> -TTR   | 5,6-carboxyfluorescein-GG-EEE-GG-YTIAALLSPYS-NH <sub>2</sub>          |
| TAMRA-K <sub>3</sub> -TTR | 5,6-carboxytetramethylrhodamine-GG-EEE-GG-YTIAALLSPYS-NH <sub>2</sub> |
| Lip-E <sub>3</sub> -TTR   | $\alpha$ -lipoyl-EEE-GG-YTIAALLSPYS-NH <sub>2</sub>                   |

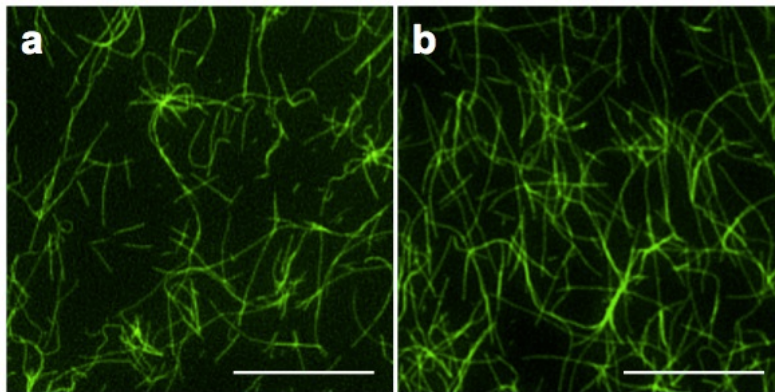

**Figure S1.** Fluorescence microscopy images of the fluorescein-functionalized fibrils formed from a mixture of  $K_3$ -TTR:FAM- $E_3$ -TTR: $E_3$ -TTR before (a) and after (b) purification via centrifugation and dialysis. The scale bar represents 20  $\mu$ m.

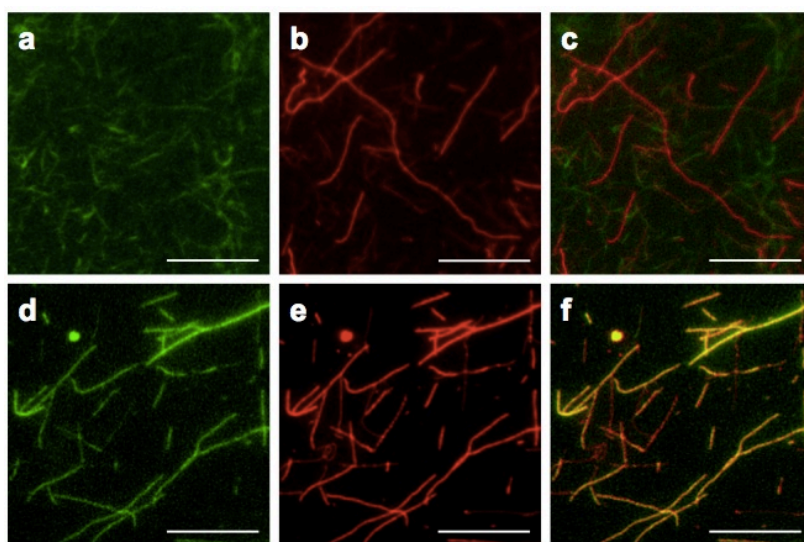

**Figure S2.** (a–c) Mixing of individually formed FAM and TAMRA fibrils, and (d–f) co-fibrillation with FAM-E<sub>3</sub>-TTR and TAMRA-K<sub>3</sub>-TTR peptides did not lead to the formation of tandem structures on the fibrils (c,f). Excitation/emission wavelengths were 480/535 and 540/605 nm in (a,d) and (b,e), respectively, and each image was superimposed (c,f). The scale bar represents 20  $\mu\text{m}$ .

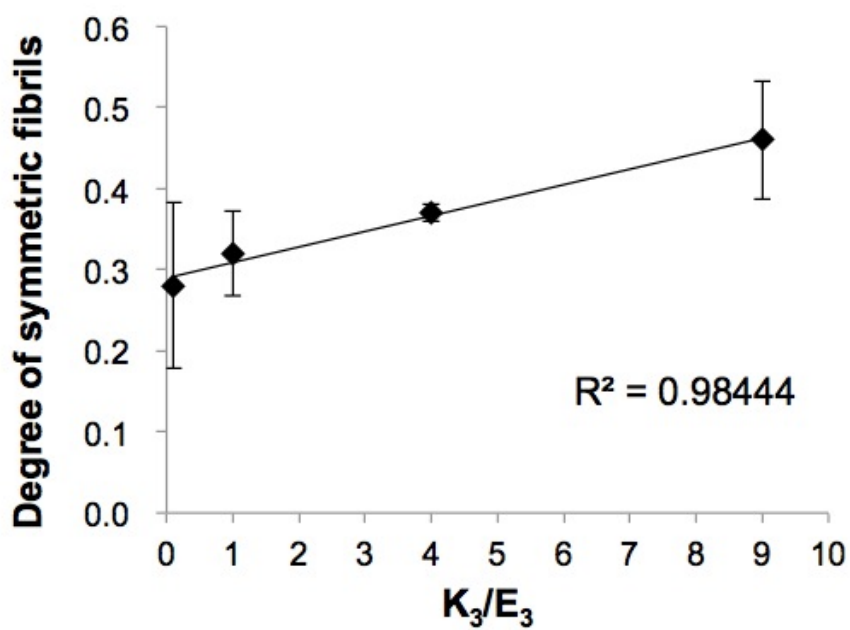

**Figure S3.**  $K_3/E_3$ -ratio dependency of the degree of symmetric tandem fibrils. The line represents the linear regression with  $R^2$  of 0.988. The error bars represent standard deviations.

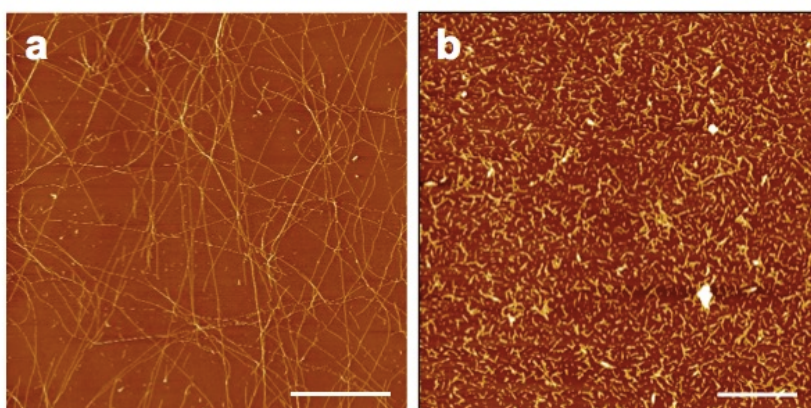

**Figure S4.** AFM images of the  $\alpha$ -lipoylated fibrils (a) before and (b) after sonication. The fibrils were adsorbed on mica. The average length of the sonicated fibrils was  $45\pm 20$  nm. The scale bars represent 5 and 1  $\mu\text{m}$  in (a) and (b), respectively.

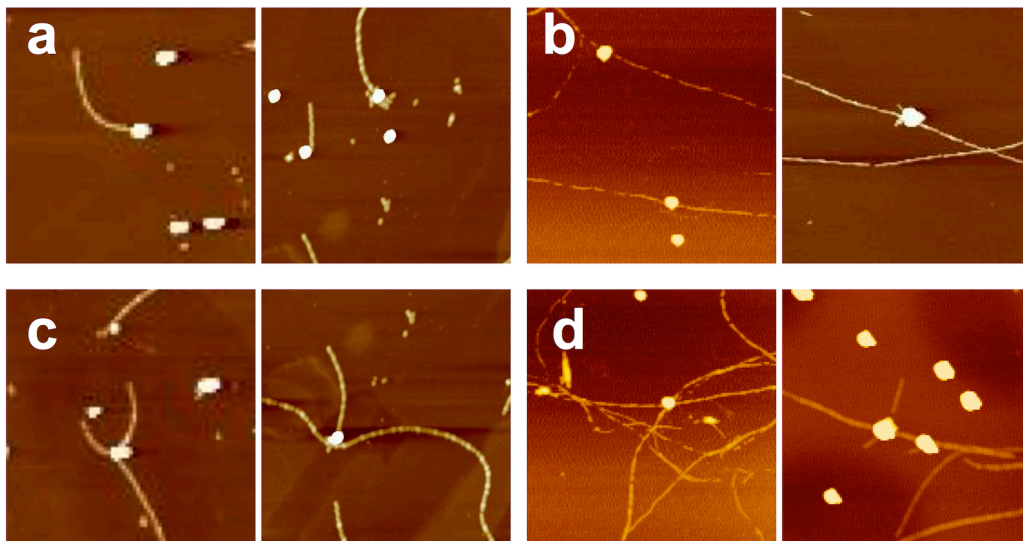

**Figure S5.** AFM image of the nanoparticle-fibril complexes. One fibril per one gold nanoparticle (**a**), two fibrils (**b**), three fibrils (**c**), and four fibrils (**d**) per one gold nanoparticle were shown.

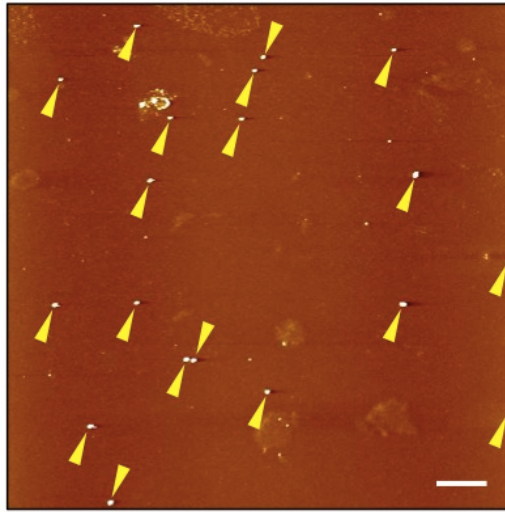

**Figure S6.** AFM image of a mica surface after the incubation of a mixture of  $K_3$ -TTR: $E_3$ -TTR = 1:1 with fibril fragment-free gold nanoparticles. The nanoparticles are indicated by the yellow arrowheads. The scale bar represents 1  $\mu\text{m}$ .
